# Supplementary material for: Speedup and fracturing of George VI Ice Shelf, Antarctic Peninsula
Source: Copernicus journal article supplement (doi:10.5194/tc-7-797-2013), 2013-05-06
Supplement: Supplementary file 1 [file tc-7-797-2013-supplement.pdf]

**Supplementary Table 1.** List of satellite scenes and their key uses. FM = Full glaciological mapping assessment, SA = spatial assessment, FT = used for surface feature tracking and InS = InSAR

| Sensor (pixel size) | Scene ID              | Date (dd/mm/yyyy) | Path | Row | Scene centre (Lat/ Long (°)) |         | FM | SA | FT |
|---------------------|-----------------------|-------------------|------|-----|------------------------------|---------|----|----|----|
| MSS (79 m)          | LM1231110007300910    | 09/01/1973        | 231  | 110 | -70.759                      | -67.369 | ✓  | ✓  |    |
| MSS (79 m)          | LM1231111007300910    | 09/01/1973        | 231  | 111 | -72.017                      | -69.683 | ✓  | ✓  |    |
| MSS (79 m)          | LM1231112007300910    | 09/01/1973        | 231  | 112 | -73.245                      | -72.311 | ✓  | ✓  |    |
| MSS (79 m)          | LM12331091974006AAA04 | 06/01/1974        | 233  | 109 | -69.381                      | -68.182 | ✓  | ✓  |    |
| MSS (82 m)          | LM32331101979034AAA04 | 03/02/1979        | 233  | 110 | -70.647                      | -70.199 | ✓  | ✓  |    |
| MSS (82 m)          | LM52171121986076AAA03 | 17/03/1986        | 217  | 112 | -73.516                      | -72.198 |    | ✓  | ✓  |
| TM (30 m)           | L5217110_11019860128  | 28/01/1986        | 217  | 110 | -67.696                      | -70.914 |    |    | ✓  |
| TM (30 m)           | L4219109_10919880225  | 25/02/1988        | 219  | 109 | -69.140                      | -69.567 |    |    | ✓  |
| TM (30 m)           | LT42191121989010XXX02 | 10/01/1989        | 219  | 112 | -73.475                      | -75.568 |    |    | ✓  |
| TM (30 m)           | L4218110_11019890220  | 20/02/1989        | 218  | 110 | -69.393                      | -70.896 |    |    | ✓  |
| TM (30 m)           | LT42171121989060XXX02 | 01/03/1989        | 217  | 112 | -73.488                      | -72.537 |    |    | ✓  |
| TM (30 m)           | LT42181091989083XXX02 | 24/03/1989        | 218  | 109 | -69.650                      | -67.469 | ✓  | ✓  | ✓  |
| TM (30 m)           | L4219109_10919891126  | 26/11/1989        | 219  | 109 | -69.019                      | -69.646 |    |    | ✓  |
| TM (30 m)           | L4217110_11019900115  | 15/01/1990        | 217  | 110 | -67.693                      | -70.926 |    |    | ✓  |
| TM (30 m)           | LT42191091990029XXX01 | 29/01/1990        | 219  | 109 | -69.657                      | -69.024 |    |    | ✓  |
| TM (30 m)           | LT52191091991024XXX02 | 24/01/1991        | 219  | 109 | -69.588                      | -69.167 |    |    | ✓  |
| TM (30 m)           | LT52161121991035XXX03 | 04/02/1991        | 216  | 112 | -73.473                      | -70.867 | ✓  | ✓  | ✓  |
| TM (30 m)           | L5218110_11019910218  | 18/02/1991        | 218  | 110 | -69.457                      | -70.872 |    |    | ✓  |
| TM (30 m)           | LT42171121989060XXX02 | 01/03/1989        | 217  | 112 | -73.488                      | -72.537 |    |    | ✓  |
| ETM+ (15 m)         | L71217112_11220000228 | 28/02/2000        | 217  | 112 | -72.317                      | -73.505 |    |    | ✓  |
| ETM+ (15 m)         | L71218109_10920010104 | 04/01/2001        | 218  | 109 | -67.424                      | -69.626 | ✓  | ✓  | ✓  |
| ETM+ (15 m)         | L71217110_11020010214 | 14/02/2001        | 217  | 110 | -67.800                      | -70.965 |    |    | ✓  |
| ETM+ (15 m)         | L71217110_11020011129 | 29/11/2001        | 217  | 110 | -67.895                      | -70.949 |    |    | ✓  |
| ETM+ (15 m)         | L71218110_11020011206 | 06/12/2001        | 218  | 110 | -69.453                      | -70.925 |    |    | ✓  |
| ETM+ (15 m)         | L71218110_11020020107 | 07/01/2002        | 218  | 110 | -74.034                      | -73.472 |    |    | ✓  |
| ETM+ (15 m)         | L71218112_11220020107 | 07/01/2002        | 218  | 112 | -73.974                      | -73.499 |    |    | ✓  |
| ETM+ (15 m)         | L71217110_11020021202 | 02/12/2002        | 217  | 110 | -67.834                      | -70.958 |    |    | ✓  |
| ETM+ (15 m)         | L71218110_11020021225 | 25/12/2002        | 218  | 110 | -69.357                      | -70.933 |    |    | ✓  |
| ETM+ (15 m)         | L71217112_11220030103 | 03/01/2003        | 217  | 112 | -72.544                      | -73.463 |    |    | ✓  |
| ETM+ (15 m)         | L71218110_11020030110 | 10/01/2003        | 218  | 110 | -72.554                      | -73.354 |    |    | ✓  |
| ETM+ (15 m)         | LE72161122003012EDC00 | 12/01/2003        | 216  | 112 | -73.473                      | -70.867 | ✓  | ✓  |    |
| ETM+ (15 m)         | LE72161112003012EDC00 | 12/01/2003        | 216  | 111 | -72.191                      | -68.582 | ✓  |    |    |
| ETM+ (15 m)         | LE72161102003044EDC01 | 13/02/2003        | 216  | 110 | -70.947                      | -66.287 | ✓  | ✓  |    |
| ETM+ (15 m)         | L72218110_11020040317 | 17/03/2004        | 218  | 110 | -70.958                      | -69.385 |    |    | ✓  |
| ETM+ (15 m)         | L72218110_11020050115 | 15/01/2005        | 218  | 110 | -70.828                      | -69.400 |    |    | ✓  |
| ETM+ (15 m)         | L72218110_11020060118 | 18/01/2006        | 218  | 110 | -70.859                      | -69.391 |    |    | ✓  |
| ETM+ (15 m)         | L72218110_11020080108 | 08/01/2008        | 218  | 110 | -70.888                      | -69.355 |    |    | ✓  |
| ETM+ (15 m)         | L72219112_11220081114 | 14/11/2008        | 219  | 112 | -73.405                      | -75.721 |    |    | ✓  |
| ETM+ (15 m)         | L72218110_11020090211 | 11/02/2009        | 218  | 110 | -70.946                      | -69.379 |    |    | ✓  |
| ETM+ (15 m)         | L72218109_10920091110 | 10/11/2009        | 218  | 109 | -69.639                      | -67.507 |    |    | ✓  |
| ETM+ (15 m)         | L72217110_11220100106 | 06/01/2010        | 217  | 110 | -67.938                      | -70.871 |    | ✓  | ✓  |

|             |                       |            |     |     |         |         |   |   |   |
|-------------|-----------------------|------------|-----|-----|---------|---------|---|---|---|
| ETM+ (15 m) | L72217112_11220100106 | 06/01/2010 | 217 | 112 | -73.462 | -72.415 |   |   | ✓ |
| ETM+ (15 m) | L71218111_11120100113 | 13/01/2010 | 218 | 111 | -71.557 | -72.174 |   |   | ✓ |
| ETM+ (15 m) | L71216111_11120100115 | 15/01/2010 | 216 | 111 | -72.191 | -68.582 | ✓ | ✓ |   |
| ETM+ (15 m) | L72216112_11220100115 | 15/01/2010 | 216 | 112 | -73.494 | -71.060 | ✓ | ✓ | ✓ |
| ETM+ (15 m) | L72218109_10920100129 | 29/01/2010 | 218 | 109 | -69.641 | -67.488 |   |   | ✓ |
| ETM+ (15 m) | L72218110_11020100129 | 29/01/2010 | 218 | 110 | -70.822 | -69.485 | ✓ | ✓ | ✓ |
| ETM+ (15 m) | L72218112_11220100129 | 29/01/2010 | 218 | 112 | -73.488 | -74.155 | ✓ |   | ✓ |
| ETM+ (15 m) | L72216112_11220101201 | 01/02/2010 | 216 | 112 | -73.522 | -71.101 | ✓ | ✓ | ✓ |

| Sensor    | Orbit/Frame<br>(Ascending/Descending) | Date<br>(dd/mm/yyyy) | Scene centre |            | SA | InS | Image<br>Pair |
|-----------|---------------------------------------|----------------------|--------------|------------|----|-----|---------------|
|           |                                       |                      | (Lat         | / Long(°)) |    |     |               |
| ERS-2 SAR | 03924 5651 (A)                        | 20/01/1996           | -73.125      | 289.613    | ✓  |     | -             |
| ERS-1 SAR | 23983 5729 (A)                        | 15/02/1996           | -70.067      | 291.906    |    | ✓   | 1             |
| ERS-2 SAR | 04310 5729 (A)                        | 16/02/1996           | -70.071      | 291.909    | ✓  | ✓   | 1             |
| ERS-1 SAR | 22413 5096 (D)                        | 28/10/1995           | -70.145      | 291.656    |    | ✓   | 2             |
| ERS-2 SAR | 02740 5096 (D)                        | 29/10/1996           | -70.189      | 291.564    |    | ✓   | 2             |
| ERS-2 SAR | 78033 5140 (D)                        | 24/03/2010           | -72.903      | 288.321    | ✓  |     | -             |
